# Supplementary material
Source: Elsevier journal article supplement (https://www.sciencedirect.com/science/article/pii/S1888441519301444)
Supplement: mmc1 [file S1888441519301444:mmc1.pdf]

## Anexo 1.

**Fecha de nacimiento (día/mes/año):**        /        /

**¿Es Ud. adjunto?** Si / No, soy residente

**Años de especialista** <5 años / entre 5 y 10 años / > 10 años

**¿Por favor seleccione la(s) aplicación(es) que utiliza para sus decisiones clínicas o estudio?**

(Están ordenadas alfabéticamente)

|    |                        |
|----|------------------------|
| 1  | AAOS Access            |
| 2  | AO Surgery Reference   |
| 3  | AO/OTA Classification  |
| 4  | Arthroplasty (JOA)     |
| 5  | Bullets (Orthobullets) |
| 6  | Epocrates              |
| 7  | Facebook               |
| 8  | iDoctus                |
| 9  | Instagram              |
| 10 | Knee Goniometer        |
| 11 | MyATLS Trauma          |
| 12 | OrthoPilot             |
| 13 | QxREAD                 |
| 14 | TouchSurgery           |
| 15 | Vumedi                 |
| 16 | Whatsapp               |
| 17 | Youtube                |
| 18 | Otra(s):               |

**¿Alguna vez ha utilizado Whatsapp para consultar en relación a un caso clínico?**

Si / No

**¿Alguna vez ha utilizado Whatsapp para ser consultado(a) en relación a un caso clínico?**

Si / No

**¿Pertenece Ud. a algún grupo de Whatsapp en el cual se comparta información clínica?**

Si / No

**La comunicación entre clínicos a través del Whatsapp es una herramienta útil para la toma decisiones terapéuticas**

En desacuerdo / Algo en desacuerdo / Neutral / Algo de acuerdo / De acuerdo
